# Supplementary material
Source: PubMed Central journal article supplement (PMC6703923)
Supplement: NIHMS1534057-supplement-1.pdf [file NIHMS1534057-supplement-1.pdf]

## Supplementary Material

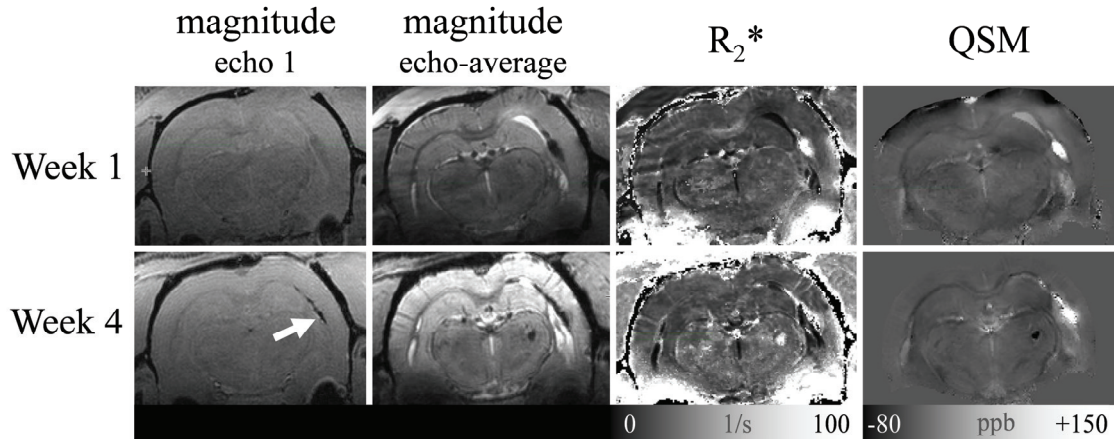

**Figure S.1.** Illustration of the effect of susceptibility change of blood during degradation on magnitude image contrast. Shown are images from a s-mTBI animal, implying that the animal was injured only once at week 1. At week 1, the first magnitude echo did not show a pronounced hypo-intensity at the location of the hemorrhage, whereas a hemorrhage was observed on the echo-averaged image,  $R_2^*$  map, and on the susceptibility map. At week 4, the hemorrhage was visible on all images.

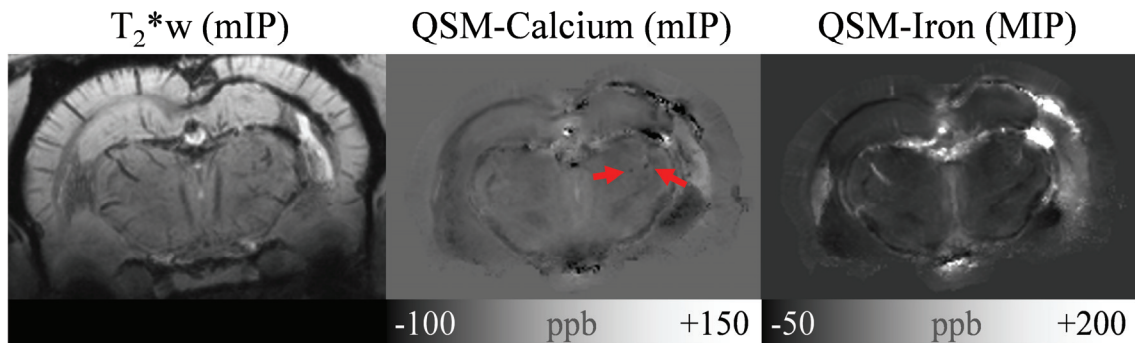

**Figure S.2.** MRI findings of calcification that could not be confirmed with histology. Shown are, from left to right, a mIP of the  $T_2^*$ -weighted magnitude, a mIP of the susceptibility map (delineating calcium) and a MIP of the susceptibility map (delineating iron). All projections were calculated over  $580\mu\text{m}$ . The red arrows mark two small calcifications on the susceptibility map.
